# Supplementary material
Source: PubMed Central journal article supplement (PMC7434331)
Supplement: mmc1.pdf [file mmc1.pdf]

**Appendix**  
**Frequency, Associated Risk Factors, and Characteristics of COVID-19 Among Healthcare Personnel in a Spanish Health Department**  
**Algado-Sellés et al.**

**Appendix Figure 1.** Distribution of by day of evaluated (n=1,791), symptomatic (n=784), confirmed COVID-19 (n=156) and severe COVID-19 (n=18) healthcare personnel.

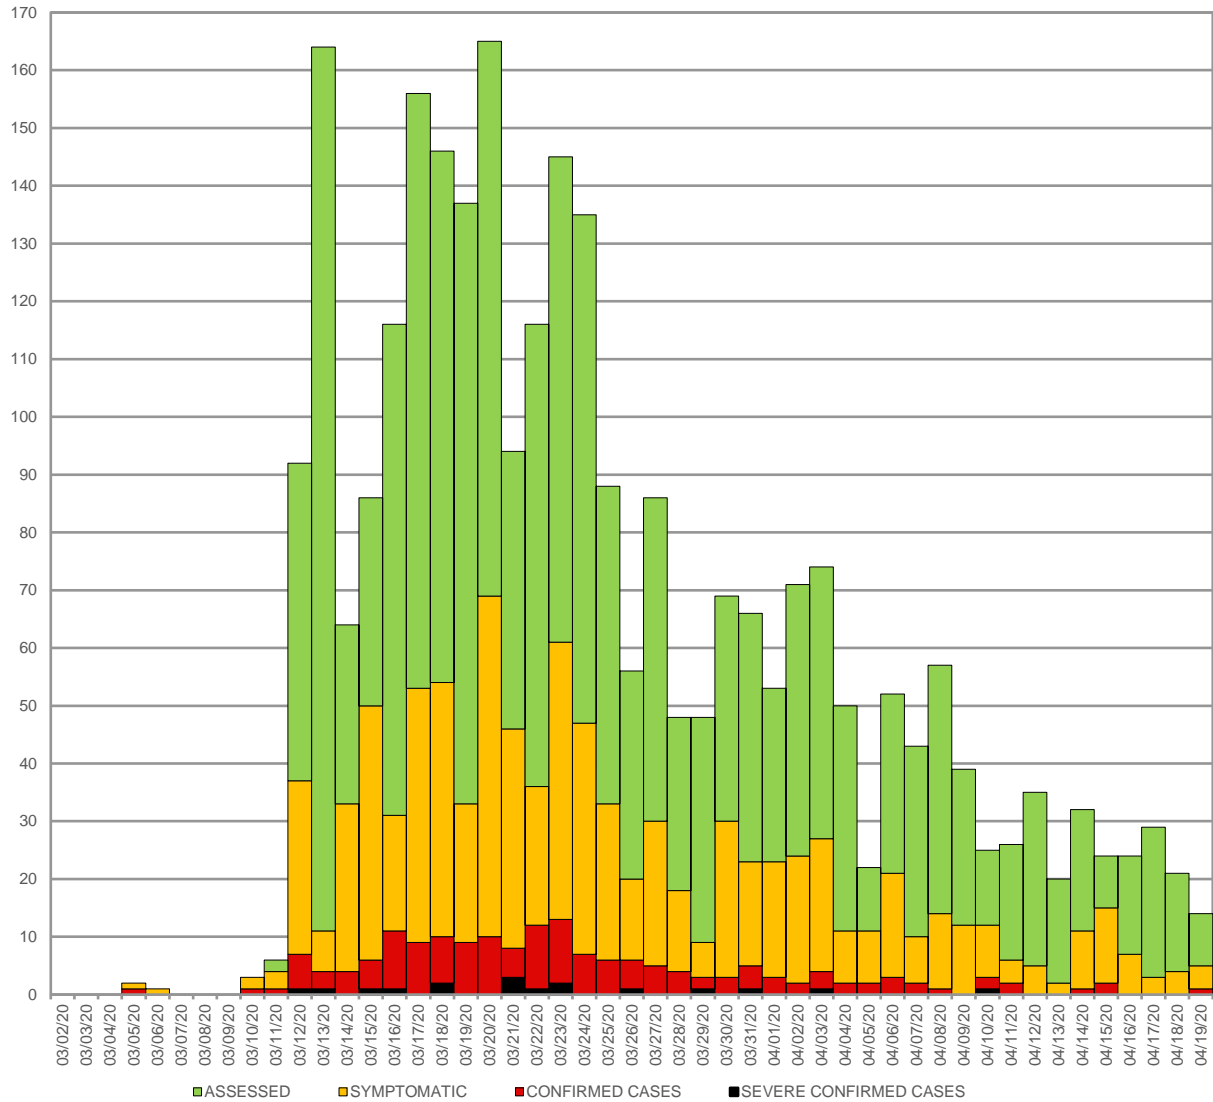

**Appendix**  
**Frequency, Associated Risk Factors, and Characteristics of COVID-19 Among Healthcare Personnel in a Spanish Health Department**  
**Algado-Sellés et al.**

**Appendix Table 1.** Prevalence of Evaluated, Symptomatic, COVID-19 Confirmed, Severe COVID-19 and Admitted to the Intensive Care Unit (n=3,900) Healthcare Personnel

| <b>Variable</b>      | <b>n</b> | <b>Prevalence (95% CI)</b> |
|----------------------|----------|----------------------------|
| Evaluated            | 1,791    | 45.9 (44.3, 47.5)          |
| Symptomatic          | 784      | 20.1 (18.8, 21.4)          |
| Symptomatic COVID-19 | 156      | 4.0 (3.4, 4.6)             |
| Severe COVID-19      | 18       | 0.5 (0.2, 0.7)             |
| ICU COVID-19         | 3        | 0.1 (0.0, 0.2)             |
